# Supplementary material
Source: PubMed Central journal article supplement (PMC2574941)
Supplement: NIHMS71342-supplement.pdf [file NIHMS71342-supplement.pdf]

## Supporting Information

# Ni(II), Cu(II), and Zn(II) diethyldithiocarbamate complexes show various activity against proteasome in a breast cancer cell line

### Table of Contents

1. Basic Information & Reaction Yields
2. Crystal Structure Determination
3. Crystal Data & Structure Refinement
4. Molecular Structures of Monomer Complexes
5. Molecular Structures of Dimers
6. Inhibition of MDA-MB-231 Cell Proliferation
7. Apoptotic Morphological Changes in MDA-MB-231 Cell Line
8. Proteasomal Activity in Intact MDA-MB-231 Cells
9. Activity of Purified 20S Proteasome

**Table 1.** Basic Information & Reaction Yields.

| Compound               | Formula                                                         | Mr     | Color | Yield (%) | Dimer |
|------------------------|-----------------------------------------------------------------|--------|-------|-----------|-------|
| Cu(EtDTC) <sub>2</sub> | CuC <sub>10</sub> H <sub>20</sub> N <sub>2</sub> S <sub>4</sub> | 360.06 | brown | 60        | yes   |
| Zn(EtDTC) <sub>2</sub> | ZnC <sub>10</sub> H <sub>20</sub> N <sub>2</sub> S <sub>4</sub> | 361.89 | white | 45        | yes   |
| Ni(EtDTC) <sub>2</sub> | NiC <sub>10</sub> H <sub>20</sub> N <sub>2</sub> S <sub>4</sub> | 355.24 | green | 70        | not   |

### Crystal Structure Determination

Complexes were crystallized from mixtures of diethylether and acetone.

The intensity data were collected on a KUMA KM-4 CCD kappa-axis diffractometer using a graphite monochromatized Mo-K $\alpha$  radiation ( $\lambda = 0.71069 \text{ \AA}$ ). The structure was solved by direct methods. Non-hydrogen atoms were refined anisotropically while hydrogen atoms were inserted in calculated positions and isotropically refined assuming a "ride-on" model. The crystal data for compound **1** and other pertinent information are summarized in Table 1. Table 2 contains atomic parameters of non-hydrogen atoms and a list of interatomic distances and angles is in Table 3. The programs used were: SHELX-97 [1] program package for the structure determination and structure refinement and tables, and the drawings were made by XP program of Bruker SHELXTL V5.1 [2] program package.

CCDC 654111 - 654116 contains the supplementary crystallographic data for this paper. These data can be obtained free of charge at [www.ccdc.cam.ac.uk/conts/retrieving.html](http://www.ccdc.cam.ac.uk/conts/retrieving.html)

[or from the Cambridge Crystallographic Data Centre, 12, Union Road, Cambridge CB2 1EZ, UK; fax: (internat.) +44-1223/336-033; E-mail: [deposit@ccdc.cam.ac.uk](mailto:deposit@ccdc.cam.ac.uk)]

- [1] G.M.Sheldrick: SHELX-97 program package, University of Goettingen 1997  
 [2] G.M. Sheldrick: SHELXTL V 5.10, Bruker AXS Inc., Madison, WI, 1997

**Table 2.** Crystal Data & Structure Refinement.

|                                   |                                                                                            |                                                                                           |                                                                                             |
|-----------------------------------|--------------------------------------------------------------------------------------------|-------------------------------------------------------------------------------------------|---------------------------------------------------------------------------------------------|
| Empirical formula                 | C <sub>10</sub> H <sub>20</sub> N <sub>2</sub> S <sub>4</sub> Ni                           | C <sub>10</sub> H <sub>20</sub> N <sub>2</sub> S <sub>4</sub> Zn                          | C <sub>20</sub> H <sub>40</sub> N <sub>4</sub> S <sub>8</sub> Cu <sub>2</sub>               |
| Formula weight                    | 355.24                                                                                     | 361.89                                                                                    | 720.12                                                                                      |
| Temperature                       | 120 K                                                                                      |                                                                                           |                                                                                             |
| Wavelength                        | 0.71069 Å                                                                                  |                                                                                           |                                                                                             |
| Crystal system                    | Monoclinic                                                                                 | Monoclinic                                                                                | Monoclinic                                                                                  |
| Space group                       | P2(1)/c                                                                                    | P2(1)/n                                                                                   | P2(1)/n                                                                                     |
| Unit cell dimensions              | a = 6.0571(12)Å<br>b = 11.445(2)Å<br>c = 11.549(2)Å<br>α = 90°<br>β = 95.89(3)°<br>γ = 90° | a = 9.763(2)Å<br>b = 10.684(2)Å<br>c = 15.658(3)Å<br>α = 90°<br>β = 103.97(3)°<br>γ = 90° | a = 9.6740(19)Å<br>b = 10.554(2)Å<br>c = 15.498(3)Å<br>α = 90°<br>β = 101.67(3)°<br>γ = 90° |
| Volume                            | 796.4(3) Å <sup>3</sup>                                                                    | 1584.9(5) Å <sup>3</sup>                                                                  | 1549.6(5) Å <sup>3</sup>                                                                    |
| Z                                 | 2                                                                                          | 4                                                                                         | 2                                                                                           |
| Calculated density                | 1.481 Mg.m <sup>-3</sup>                                                                   | 1.517 Mg.m <sup>-3</sup>                                                                  | 1.543 Mg.m <sup>-3</sup>                                                                    |
| Absorption coefficient            | 1.724 mm <sup>-1</sup>                                                                     | 2.058 mm <sup>-1</sup>                                                                    | 1.929 mm <sup>-1</sup>                                                                      |
| F(000)                            | 372                                                                                        | 752                                                                                       | 748                                                                                         |
| Crystal size                      | 0.25 x 0.10 x 0.07 mm                                                                      | 0.25 x 0.20 x 0.15 mm                                                                     | 0.25 x 0.20 x 0.10 mm                                                                       |
| θ range for data collection       | 3.55 to 27.25 °                                                                            | 3.29 to 27.24 °                                                                           | 3.31 to 27.16 °                                                                             |
| Limiting indices                  | -7<h<=7,-14<k<=12,-14<l<=14                                                                | -12<h<=9,-13<k<=13,-17<l<=19                                                              | -12<h<=11,-12<k<=13,-19<l<=19                                                               |
| Reflections collected / unique    | 6983 / 1658 [R <sub>int</sub> = 0.0733]                                                    | 11500 / 3272 [R <sub>int</sub> = 0.0868]                                                  | 10737 / 3219 [R <sub>int</sub> = 0.0542]                                                    |
| Completeness to 2θ = 25.00        | 99.6 %                                                                                     | 99.7 %                                                                                    | 99.7 %                                                                                      |
| Absorption correction             | Psi-scan                                                                                   | Psi-scan                                                                                  | Psi-scan                                                                                    |
| Max. and min. transmission        | 1.000 and 0.757                                                                            | 1.000 and 0.839                                                                           | 1.000 and 0.535                                                                             |
| Refinement method                 | Full-matrix least-squares on F <sup>2</sup>                                                |                                                                                           |                                                                                             |
| Data / restraints / parameters    | 1658 / 0 / 81                                                                              | 3272 / 0 / 158                                                                            | 3219 / 0 / 158                                                                              |
| Goodness-of-fit on F <sup>2</sup> | 1.051                                                                                      | 1.059                                                                                     | 1.063                                                                                       |
| Final R indices [I > 2σ(I)]       | R1 = 0.0372, wR2 = 0.1013                                                                  | R1 = 0.0369, wR2 = 0.0971                                                                 | R1 = 0.0298, wR2 = 0.0810                                                                   |
| R indices (all data)              | R1 = 0.0378, wR2 = 0.1023                                                                  | R1 = 0.0376, wR2 = 0.0981                                                                 | R1 = 0.0305, wR2 = 0.0817                                                                   |
| Largest diff. Peak and hole       | 1.064 and -0.592 e.Å <sup>-3</sup>                                                         | 1.075 and -0.905 e.Å <sup>-3</sup>                                                        | 0.693 and -0.756 e.Å <sup>-3</sup>                                                          |

**Figure 1.** Molecular structures of Monomer Complexes.

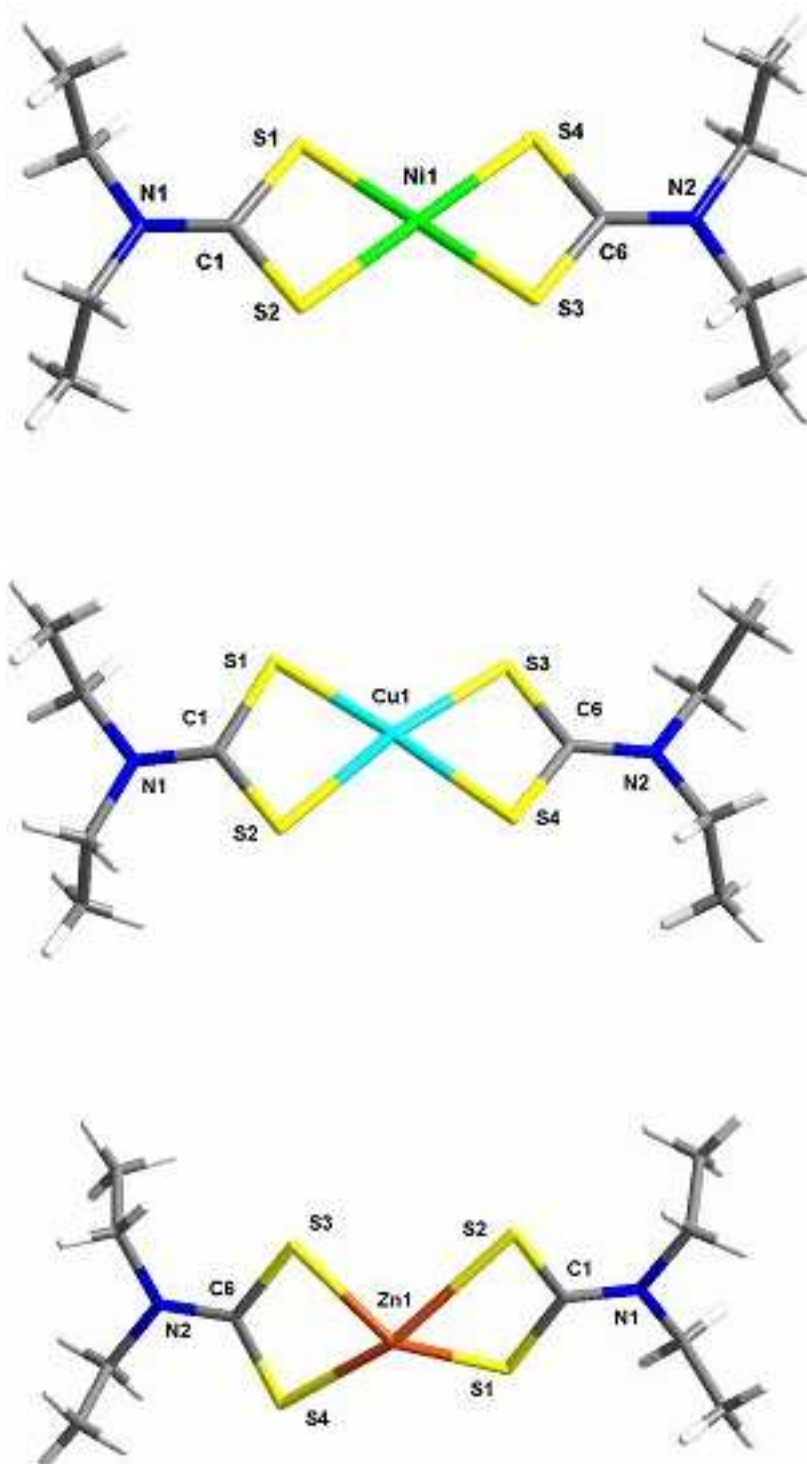

**Figure 2.** Molecular Structures of Dimers.

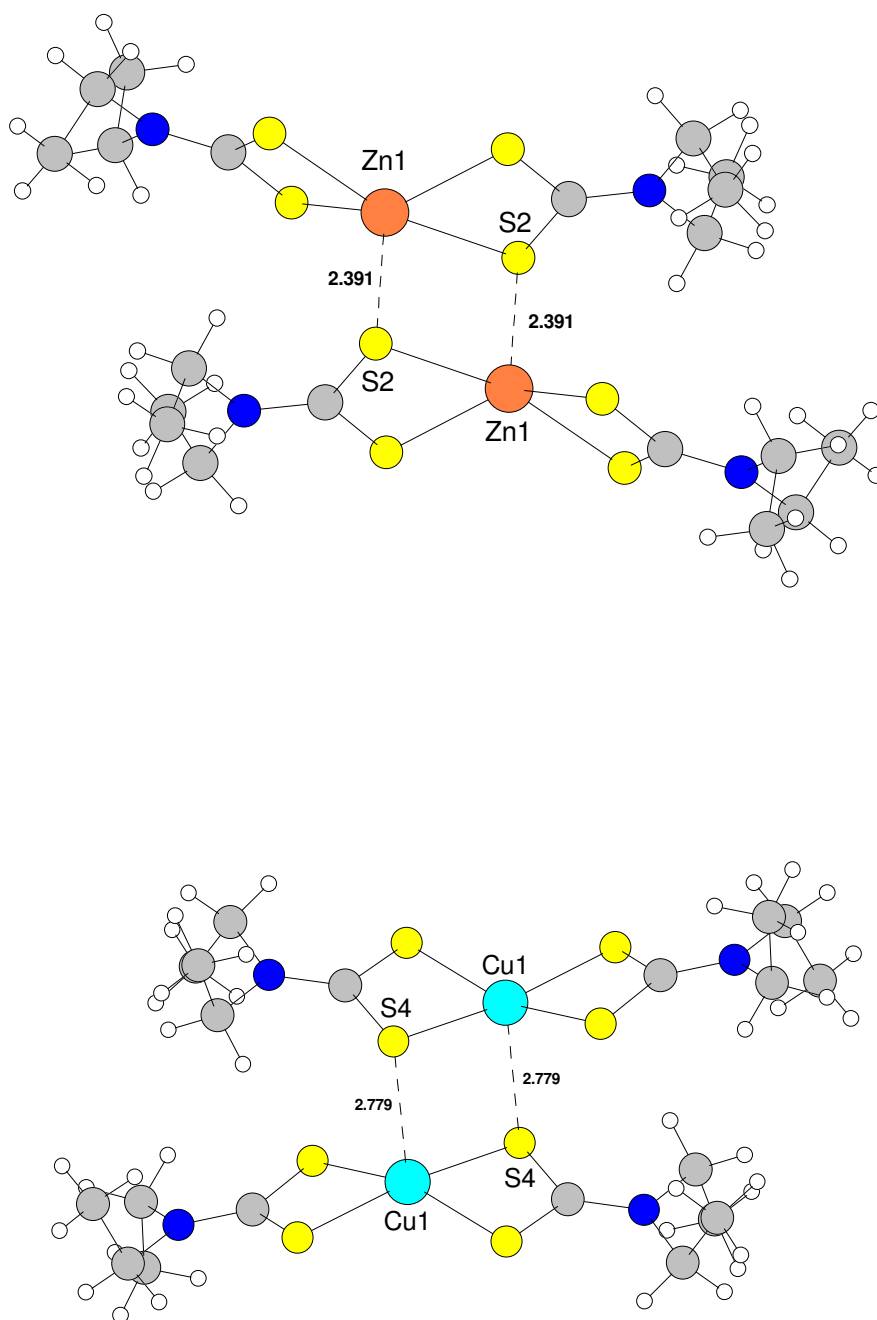

**Figure 3.** Inhibition of Breast Cancer MDA-MB-231 Cell Proliferation.

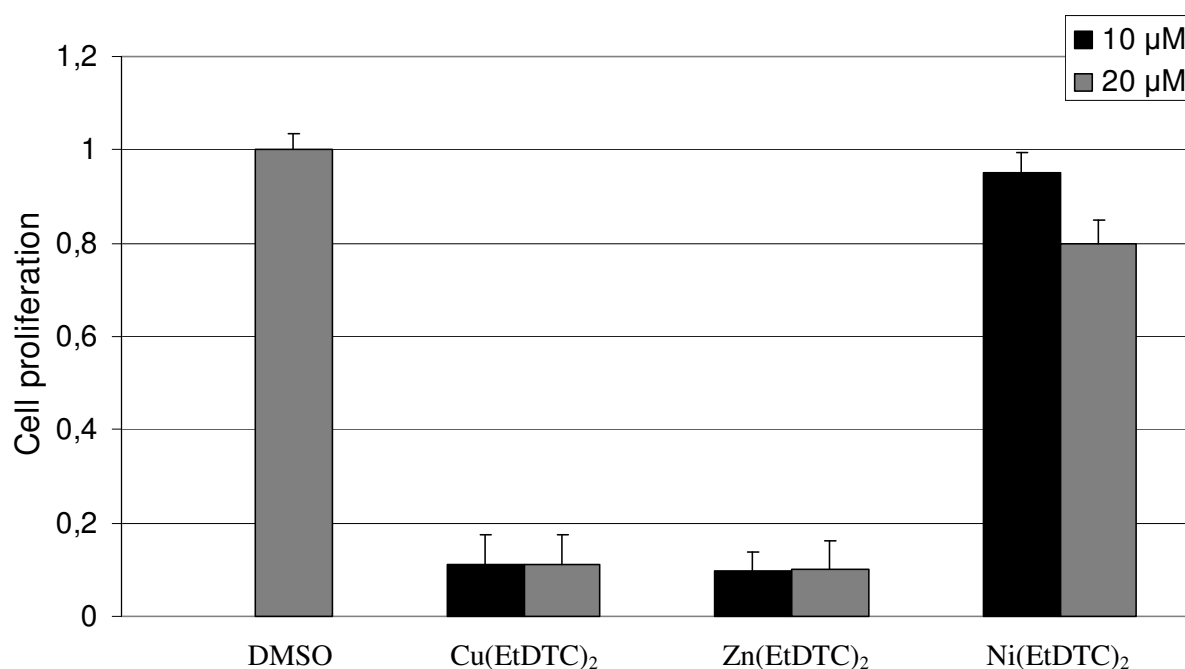

MDA-MB-231 cells were plated in 96-well plate and treated with Cu(EtDTC)<sub>2</sub>, Zn(EtDTC)<sub>2</sub>, or Ni(EtDTC)<sub>2</sub> for 24 hours, as indicated. DMSO was used as a solvent control. After the treatment, medium was removed and MTT (3-[4,5-dimethylthiazol-2-yl]-2,5-diphenyl-tetrazolium bromide) (1 mg/ml PBS) was added to each well. The cells were then incubated at 37°C for 4 h to allow for complete cleavage of the tetrazolium salt by metabolically active cells. Next, MTT was removed and 100 μl of DMSO was added, followed by colorimetric analysis using a multilabel plate reader at 560 nm (Victor<sup>3</sup>; PerkinElmer (Wellesley, MA, USA)). Cu(EtDTC)<sub>2</sub> and Zn(EtDTC)<sub>2</sub>, were equally potent by inhibiting about 90% of cell proliferation at both concentrations used, while Ni(EtDTC)<sub>2</sub> inhibited less than 10% of cell proliferation at 10 μM and about 20% at 20 μM.

**Figure 4.** Apoptotic Morphological Changes in MDA-MB-231 Cell Line.

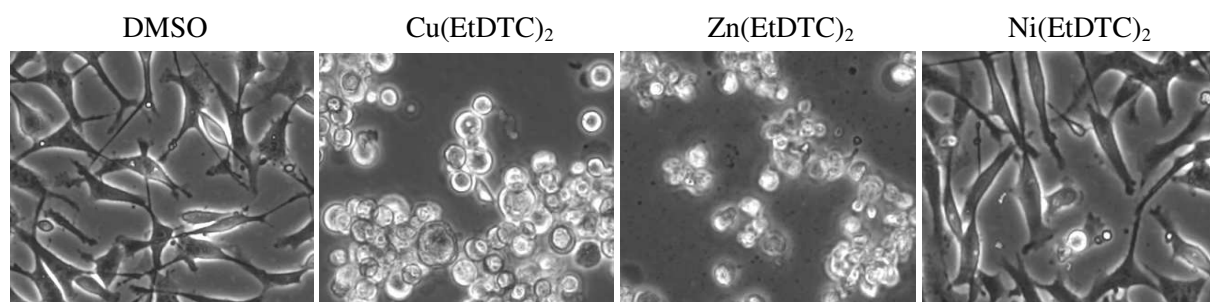

MDA-MB-231 cells were treated with 20  $\mu\text{M}$  concentration of each compound for 24 hours. A Zeiss (Thornwood, NY) Axiovert 25 microscope with phase contrast was used for cellular morphology imaging. Apoptotic morphological changes were observed in the cells treated with  $\text{Cu}(\text{EtDTC})_2$  and  $\text{Zn}(\text{EtDTC})_2$ .

**Figure 5.** Proteasomal Activity in Intact MDA-MB-231 Cells Treated with Diethyldithiocarbamate Complexes.

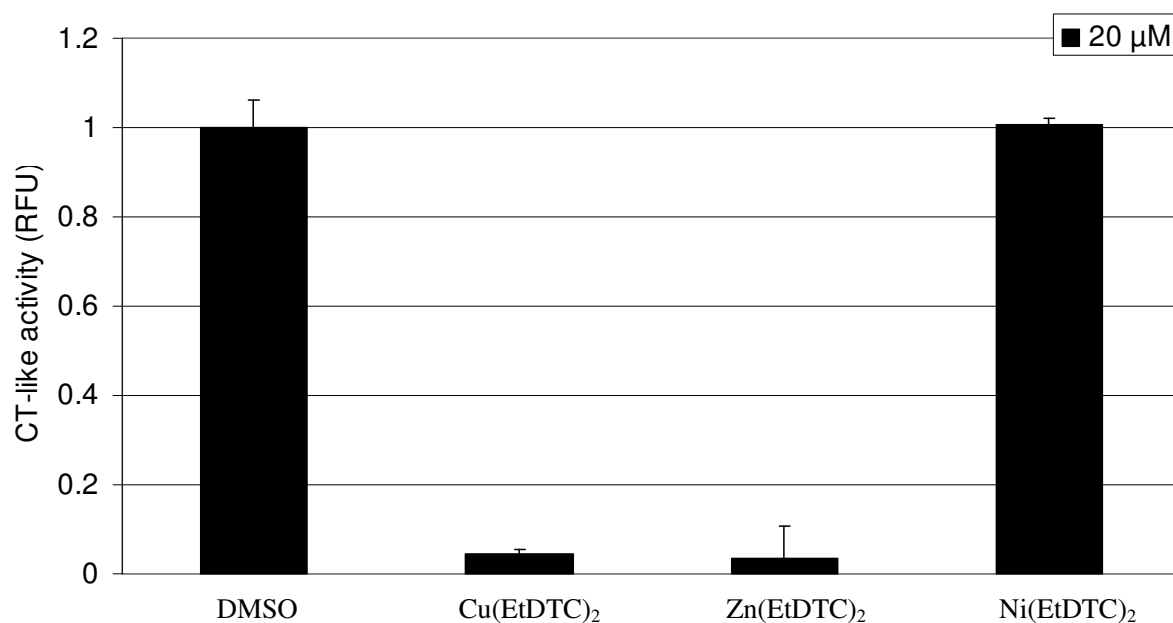

MDA-MB-231 cells were treated with each compound at 20 μM for 24 hours, harvested and used for whole cell extract preparation. Ten (10) μg of cell extract was then incubated with fluorogenic peptide substrate Suc-LLVY-AMC (specific for CT-like activity), in 100 μl of assay buffer (25 mM Tris-HCl, pH 7.5). After 2 h incubation at 37°C, inhibition of proteasomal CT-like activity was measured by the release of hydrolyzed AMC groups. Cu(EtDTC)<sub>2</sub> and Zn(EtDTC)<sub>2</sub> inhibited ~90% of the proteasomal CT-like activity, while no inhibition was found after Ni(EtDTC)<sub>2</sub> treatment.

**Figure 6.** Inhibition of Purified 20S Proteasome by Diethyldithiocarbamate Complexes.

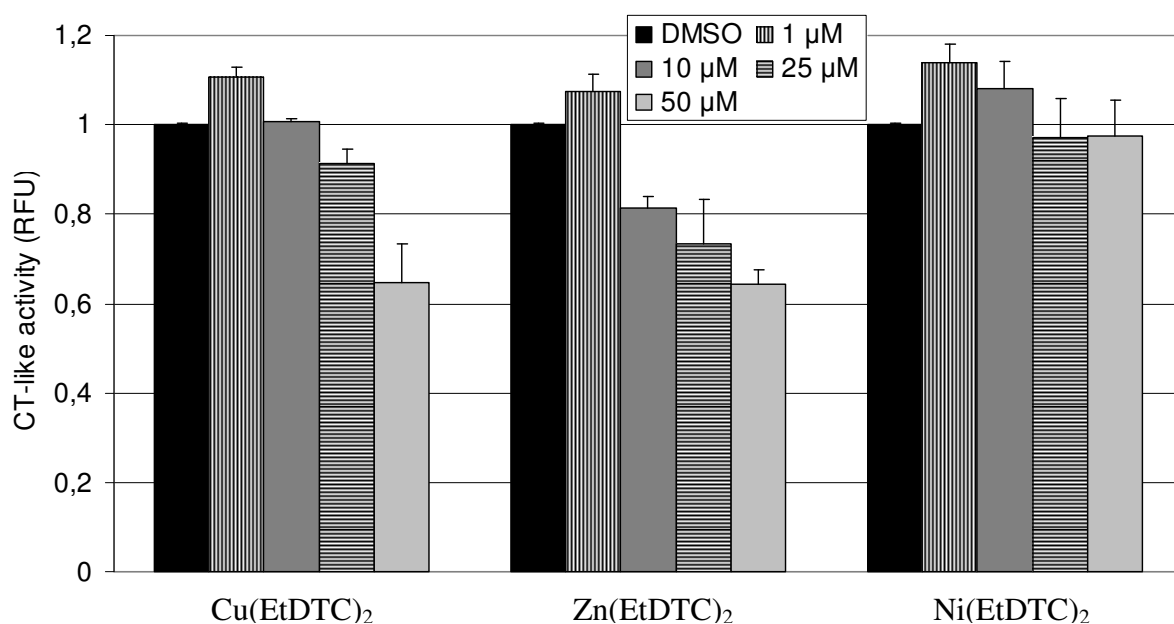

Purified rabbit 20S proteasome (17.5 ng) was incubated with fluorogenic peptide substrate Suc-LLVY-AMC (specific for CT-like activity), in 100 μl of assay buffer (25 mM Tris-HCl, pH 7.5) in the presence of different compounds at various concentrations or equivalent volume of solvent DMSO as a control. After 2 h incubation at 37°C, inhibition of proteasomal CT-like activity was measured by the release of hydrolyzed AMC groups. All three compounds showed only minor effect against the purified rabbit 20S proteasome, with  $IC_{50} > 50\mu M$ .
